# Supplementary material
Source: PubMed Central journal article supplement (PMC4234718)
Supplement: supp_141217_five-dementia-1-at.pdf [file supp_141217_five-dementia-1-at.pdf]

## Appendix 1: References

1. Mitchell SL, Teno JM, Kiely DK, et al. The clinical course of advanced dementia. *N Engl J Med* 2009;361:1529-38.
2. Sampson EL, Candy B, Jones L. Enteral tube feeding for older people with advanced dementia. *Cochrane Database Syst Rev* 2009; (2):CD007209.
3. Garrow D, Pride P, Moran W, et al. Feeding alternatives in patients with dementia: examining the evidence. *Clin Gastroenterol Hepatol* 2007;5:1372-8.
4. Gillick MR. Rethinking the role of tube feeding in patients with advanced dementia. *N Engl J Med* 2000;342:206-10.
5. American Geriatrics Society Ethics Committee and Clinical Practice and Models of Care Committee. American Geriatrics Society Feeding tubes in advanced dementia position statement. *J Am Geriatr Soc* 2014;62:1590-3.
6. Kuo S, Rhodes R, Mitchell S, et al. Natural history of feeding-tube use in nursing home residents with advanced dementia. *J Am Med Dir Assoc* 2009;10:264-70.
7. Hanson LC, Carey TS, Caprio AJ, et al. Improving decision-making for feeding options in advanced dementia: a randomized, controlled trial. *J Am Geriatr Soc* 2011;59:2009-16.
